# Supplementary material
Source: HighWire-hosted journal article supplement (https://erj.ersjournals.com/content/59/1/2100267)
Supplement: inline-supplementary-material-2 [file inline-supplementary-material-2.pdf]

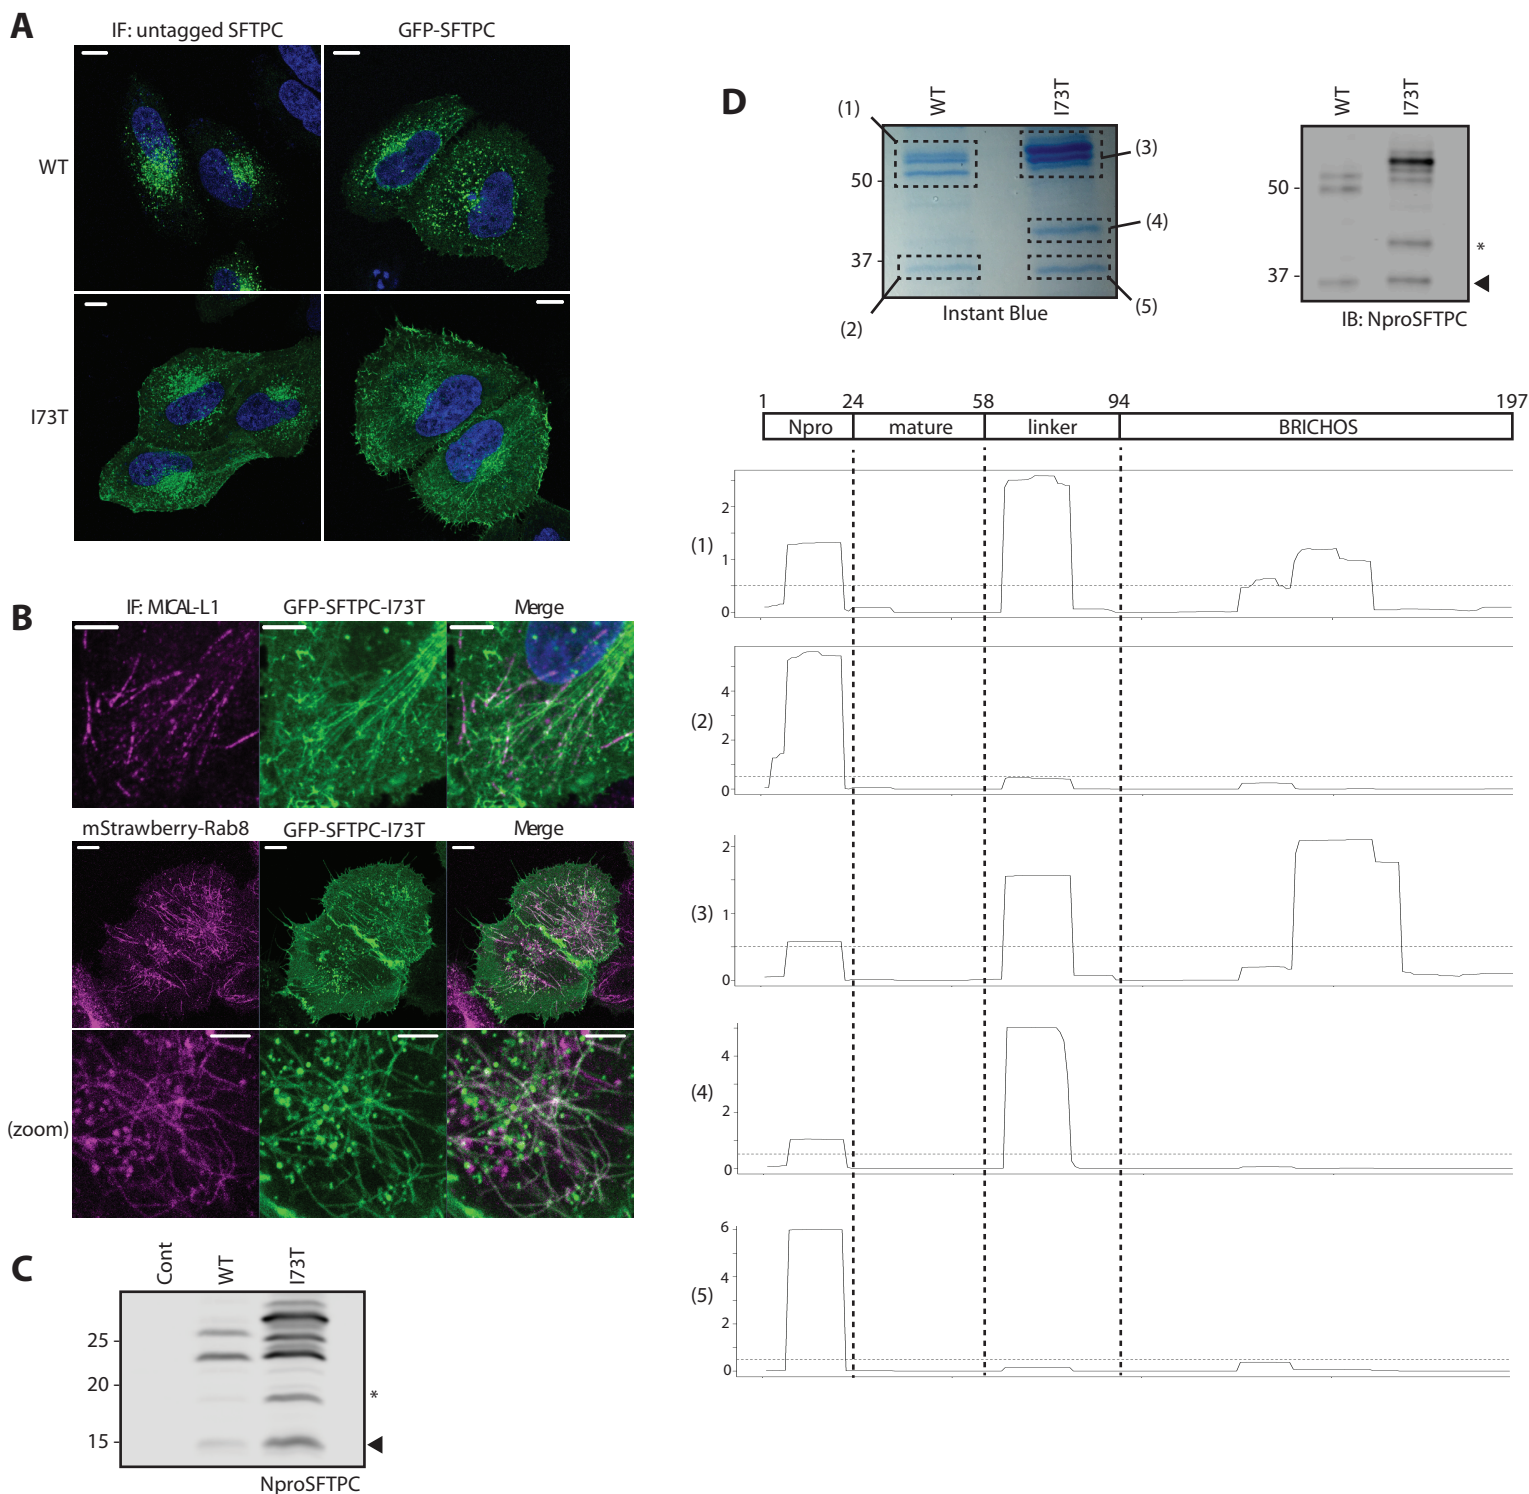

**Suppl fig 1. Characterisation of SFTPC expression and cleavage in an immortalised cell system.** (A) Confocal imaging of immunostained untagged SFTPC and GFP-SFTPC localisation in HeLa cells. Addition of the GFP tag did not alter the localisation of SFTPC-WT and I73T. (B) Intracellular tubular structures in cells expressing SFTPC-I73T are confirmed as recycling endosomes due to co-localisation with MICAL-L1 (upper panels) and mStrawberry-Rab8 (lower panels). (C) Untagged SFTPC or vector control were transiently expressed in HeLa cells and lysates immunoblotted using an N-terminal SFTPC antibody. (D) Mass spectrometry analysis confirms the aberrant intermediate seen for SFTPC-I73T is partially cleaved but retains the linker region. Pooled lysates from HeLa cells stably expressing GFP-SFTPC-WT and I73T were subjected to anti-GFP immunoprecipitation. Eluates were separated by SDS-PAGE (upper L panel) and relevant bands confirmed by immunoblot (upper R panel). Fragments obtained by trypsin digest were subjected to mass spectrometry. Good coverage was obtained except for the very hydrophobic transmembrane domain. Data displayed as coverage of each residue as a percentage of total protein coverage. Scale bar = 10 $\mu$ m / 5 $\mu$ m (zoomed images).
