# Supplementary material
Source: HighWire-hosted journal article supplement (https://erj.ersjournals.com/content/59/1/2100267)
Supplement: inline-supplementary-material-8 [file inline-supplementary-material-8.pdf]

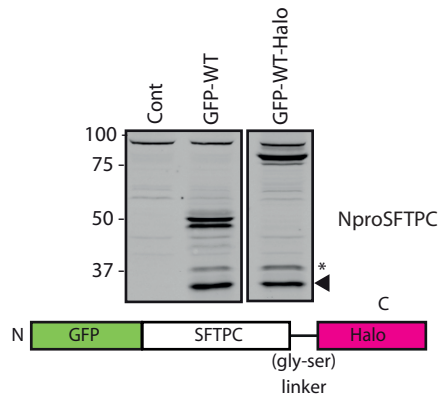

**Suppl fig 7. Addition of a C-terminal Halotag does not affect SFTPC cleavage.** HeLa cells were transfected with a vector control, GFP-SFTPC or GFP-SFTPC-Halo and lysates immunoblotted for SFTPC. This confirmed that addition of the C-terminal Halotag does not affect post translational cleavage.
