# Supplementary material
Source: HighWire-hosted journal article supplement (https://erj.ersjournals.com/content/59/1/2100267)
Supplement: inline-supplementary-material-9 [file inline-supplementary-material-9.pdf]

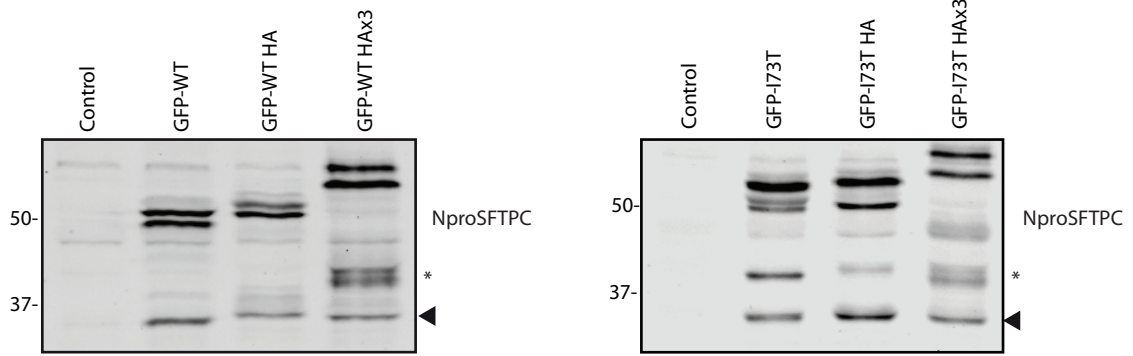

**Suppl fig 8. Alteration of the proximal linker region's length with an internal tag affects cleavage.** A vector control, one or three HA tags were introduced into the juxta-membrane linker region of GFP-SFTPC (L panel) or I73T (R panel). Expression of these constructs resulted in accumulation of a processing intermediate (\*), more marked for SFTPC-WT, consistent with impaired cleavage at the membrane.
